# Supplementary material for: Decreased Gas6 and sAxl Plasma Levels Are Associated with Hair Loss in COVID-19 Survivors
Source: MDPI journal article supplement (doi:10.3390/ijms24076257), 2023-03-26
Supplement: s1 [file s1]

## SUPPLEMENTARY

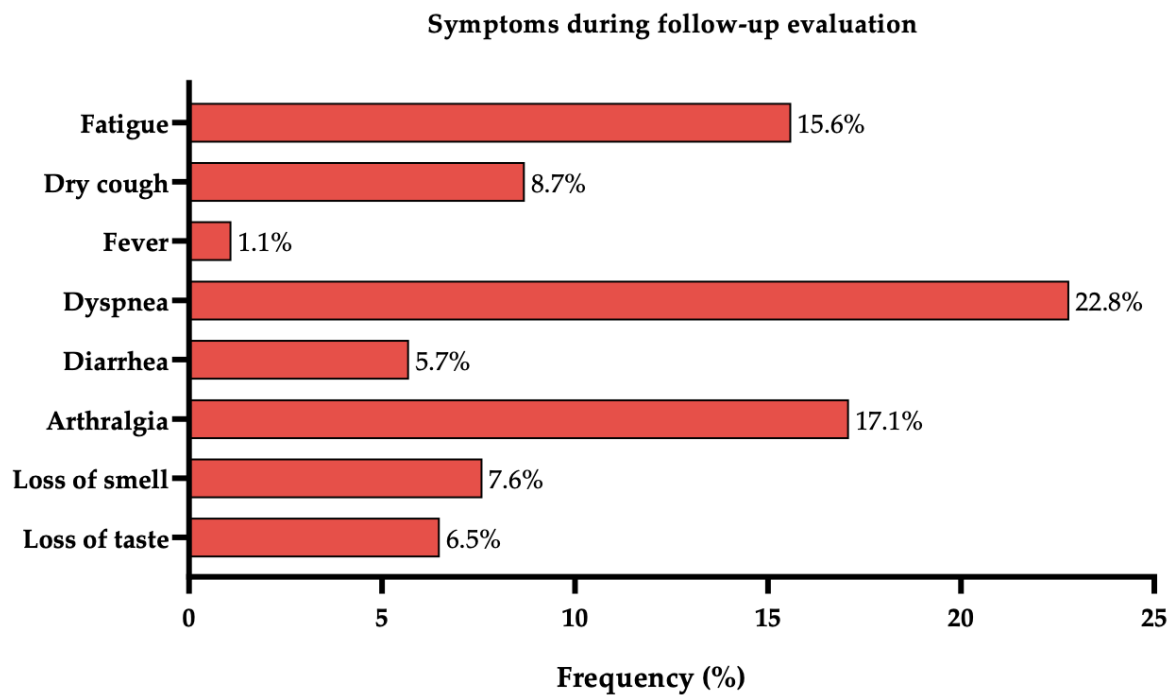

**Supplementary Figure S1: Symptoms during the follow-up evaluation.** The graph shows the frequency of the most common symptoms during the follow-up visits expressed as percentage.

**Supplementary Table S1: Univariate analysis of clinical variables and Gas6/sTAM among patients with and without residual symptoms.** Evaluation of possible association between residuals symptoms at one year follow-up visits and clinical variables: CIRS, DLCO, age, Gas6, sAxl, sMer, gender and class of severity. Continuous variables are presented as medians and interquartile range [IQR], while categorical variables as an absolute number (%). Bold text highlights the statistically significant results. For abbreviation: CIRS, cumulative illness rating scale; DLCO, diffusing capacity of carbon monoxide in lungs.

| VARIABLES    | NO RESIDUAL SYMPTOMS<br>(n=165) | RESIDUAL SYMPTOMS<br>(n=98) | p-value       |
|--------------|---------------------------------|-----------------------------|---------------|
|              | Median [IQR]                    | Median [IQR]                |               |
| CIRS         | 2.0 [1-4]                       | 2.0 [2-4]                   | 0.43          |
| DLCO, %      | 83.0 [72-96]                    | 76.0 [66-84]                | <b>0.0002</b> |
| Age, years   | 60 [51-67]                      | 61 [50-70]                  | 0.47          |
| Gas6 (ng/ml) | 28.36 [23.4-35.63]              | 28.90 [24-36,47]            | 0.37          |
| sAxl (ng/ml) | 66.44 [55.59-76.65]             | 60.60 [50.9-74.1]           | <b>0.036</b>  |
| sMer (ng/ml) | 8.53 [7.07-10.38]               | 8.96 [7.4-10.25]            | 0.49          |

|                                      |   |                        |                       |               |
|--------------------------------------|---|------------------------|-----------------------|---------------|
| Sex (male/female)                    |   | 116 (70.3%)/49 (29.7%) | 46 (46.9%)/52 (53.1%) | <b>0.0002</b> |
| Class of severity                    | 3 | 24 (14.5%)             | 16 (16.3%)            | 0.64          |
|                                      | 4 | 3 (1.8%)               | 2 (2%)                |               |
|                                      | 5 | 59 (35.8%)             | 27 (27.6%)            |               |
|                                      | 6 | 71 (43%)               | 44 (44.9%)            |               |
|                                      | 7 | 8 (4.9%)               | 9 (9.2%)              |               |
| Symptoms at the follow-up evaluation |   | 165 (62.7%)            | 98 (37.2%)            | <b>0.0001</b> |

**Supplementary Table S2: Results of the questionnaire assessing the features of hair loss.**

|                                                      |  |               |
|------------------------------------------------------|--|---------------|
| <b>When did you start notice hair loss?</b>          |  |               |
| 1. Early after hospital discharge                    |  | 21/59 (35.6%) |
| 2. Months after hospital discharge                   |  | 38/59 (64.4%) |
| <b>Type of hair loss</b>                             |  |               |
| 1. Acute/massive                                     |  | 44/59 (74.6%) |
| 2. Chronic                                           |  | 15/59 (25.4%) |
| <b>Characteristics of hair loss</b>                  |  |               |
| 1. Increased number of falling hair                  |  | 36/59 (78.0%) |
| 2. Thinning hair without increased of falling hair   |  | 13/59 (22.0%) |
| <b>How did you observed hair loss?</b>               |  |               |
| 1. While washing your hair                           |  | 23/59 (39.0%) |
| 2. While drying your hair                            |  | 1/59 (1.7%)   |
| 3. While combing your hair                           |  | 23/59 (39.0%) |
| 4. Presence of hair on the bathroom floor            |  | 1/59 (1.7%)   |
| 5. Presence of hair on the pillow in the morning     |  | 11/59 (18.6%) |
| <b>How long did you notice hair loss?</b>            |  |               |
| 1. Less than 1 year                                  |  | 42/59 (71.2%) |
| 2. More than 1 year                                  |  | 17/59 (28.8%) |
| <b>Concomitant pathologies</b>                       |  |               |
| 1. No one                                            |  | 50/59 (84.7%) |
| 2. Thyroiditis                                       |  | 7/59 (11.9%)  |
| 3. Vitiligo                                          |  | 0/59 (0%)     |
| 4. Polycystic ovary                                  |  | 2/59 (3.4%)   |
| <b>Previous diagnosis or treatments for alopecia</b> |  |               |
| 1. Yes                                               |  | 2/59 (3.4%)   |
| 2. No                                                |  | 57/59 (96.6%) |
| <b>Family history for alopecia</b>                   |  |               |
| 1. Yes                                               |  | 5/59 (8.5%)   |
| 2. No                                                |  | 54/59 (91.5%) |
| <b>Concomitant or previous therapies</b>             |  |               |
| 1. No one                                            |  | 44/59 (74.5%) |
| 2. Chemotherapy or immunotherapy                     |  | 1/59 (1.7%)   |

|                                             |               |
|---------------------------------------------|---------------|
| 3. Anticoagulants                           | 3/59 (5.1%)   |
| 4. Antiepileptic                            | 0/59 (0%)     |
| 5. Beta-blockers                            | 7/59 (11.9%)  |
| 6. Tricyclic antidepressant                 | 1/59 (1.7%)   |
| 7. Anticoagulants and beta-blocker together | 3/59 (5.1%)   |
| <b>Nutritional deficiencies</b>             |               |
| 1. No one                                   | 26/59 (44.0%) |
| 2. Supplementation of iron                  | 2/59 (3.4%)   |
| 3. Supplementation of calcium               | 1/59 (1.7%)   |
| 4. Supplementation of Vitamin D             | 27/59 (45.8%) |
| 5. Supplementation of calcium and vitamin D | 3/59 (5.1%)   |
| <b>Area of interest</b>                     |               |
| 1. Forehead                                 | 14/59 (23.7%) |
| 2. On top of the head                       | 12/59 (20.3%) |
| 3. Spread all over the head                 | 27/59 (45.8%) |
| 4. Patches on the head                      | 6/59 (10.2%)  |
| <b>Characteristics of falling hair</b>      |               |
| 1. Normal                                   | 37/59 (62.7%) |
| 2. Thinned                                  | 20/59 (33.9%) |
| 3. Broken                                   | 2/59 (3.4%)   |
| <b>Slowdown in hair growth rate</b>         |               |
| 1. Yes                                      | 22/59 (37.3%) |
| 2. No                                       | 37/59 (62.7%) |
| <b>Other area of interest</b>               |               |
| 1. No one                                   | 54/59 (91.5%) |
| 2. Eyelashes                                | 3/59 (5.1%)   |
| 3. Eyebrows                                 | 1/59 (1.7%)   |
| 4. Beard                                    | 1/59 (1.7%)   |
| <b>Presence of lesions on the scalp</b>     |               |
| 1. No one                                   | 51/59 (86.4%) |
| 2. Pustules                                 | 4/59 (6.8%)   |
| 3. Scales                                   | 3/59 (5.1%)   |
| 4. Atrophic areas                           | 1/59 (1.7%)   |
| <b>Visual perception of thinning</b>        |               |
| 1. Only by participant him/herself          | 21/59 (35.6%) |
| 2. By Participant and other people          | 38/59 (64.4%) |
| <b>Impact on quality of life</b>            |               |
| 1. Yes                                      | 18/59 (30.5%) |
| 2. No                                       | 41/59 (69.5%) |
| <b>Necessity to hide the hair loss</b>      |               |
| 1. Yes                                      | 8/59 (13.6%)  |
| 2. No                                       | 51/59 (86.4%) |
| <b>Associated symptoms</b>                  |               |
| 1. No one                                   | 40/59 (67.8%) |
| 2. Itching                                  | 12/59 (20.3%) |
| 3. Pain                                     | 1/59 (1.7%)   |
| 4. Burning                                  | 5/59 (8.5%)   |
| 5. Hyperesthesia                            | 1/59 (1.7%)   |
| <b>Treatment</b>                            |               |
| 1. No one                                   | 47/59 (79.6%) |
| 2. Topic                                    | 5/59 (8.5%)   |
| 3. Systemic                                 | 7/59 (11.9%)  |

| <b>Duration of treatment</b> |               |
|------------------------------|---------------|
| 1. 1 month                   | 2/12 (16.7%)  |
| 2. 2 months                  | 2/12 (16.7%)  |
| 3. 3 months                  | 2/12 (16.7%)  |
| 4. 4 months                  | 2/12 (16.7%)  |
| 5. 6 months                  | 4/12 (33.2%)  |
| <b>Outcome</b>               |               |
| 1. Resolved                  | 45/59 (76.3%) |
| 2. Not resolved              | 14/59 (23.7%) |
